# Supplementary material for: Hydrogenation of Carbon Dioxide to Formate Using a Cadmium-Based Metal–Organic Framework Impregnated with Nanoparticles
Source: MDPI journal article supplement (doi:10.3390/inorganics10030030), 2022-02-25
Supplement: s1 [file s1]

## SUPPORTING INFORMATION

### Hydrogenation of Carbon dioxide to formate using a Cadmium based Metal-organic Framework impregnated with Nanoparticles

Nyasha Makuve<sup>a</sup>, James Darkwa<sup>a</sup>, Gift Mehlana<sup>b\*</sup> and Banothile C.E. Makhubela<sup>a</sup>

<sup>a</sup> Department of Chemical Sciences, University of Johannesburg, Kingsway Campus, P.O Box 524, Auckland Park, 2006, Johannesburg, South Africa.

<sup>b</sup> Department of Chemical Technology, Midlands State University, Private Bag 9055 Senga Road, Gweru, Zimbabwe.

#### Supporting Information

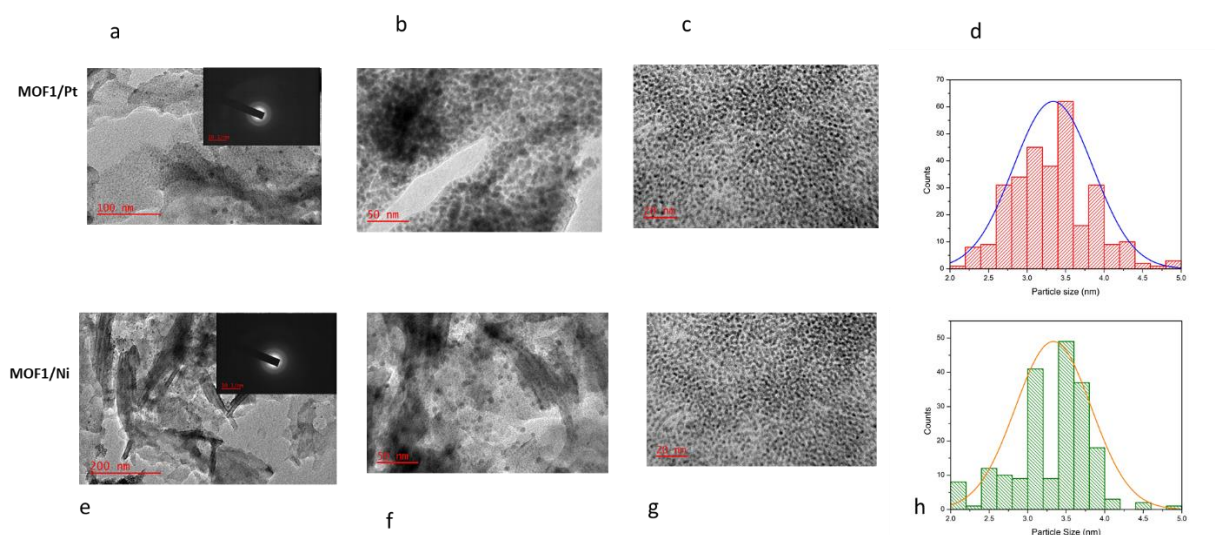

**Figure S1: HR-TEM images for MOF1@Pt and MOF1@Ni at ((a) and (e)) 100 nm, ((b) and (f)) 50 nm, ((c) and (g)) 20 nm scale and ((d) and (h)) histogram of particle size distribution.**

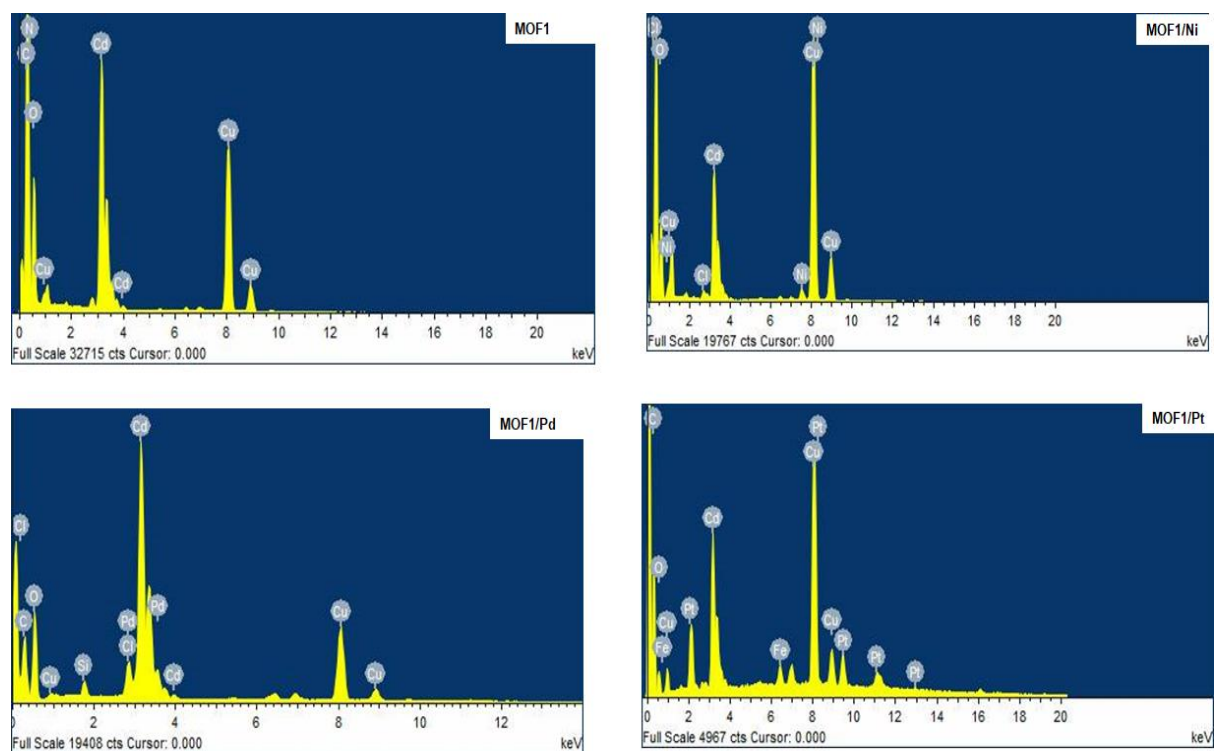

**Figure S2: EDX analysis of MOF1, MOF1/Ni, MOF1/Pd and MOF1/Pt.**

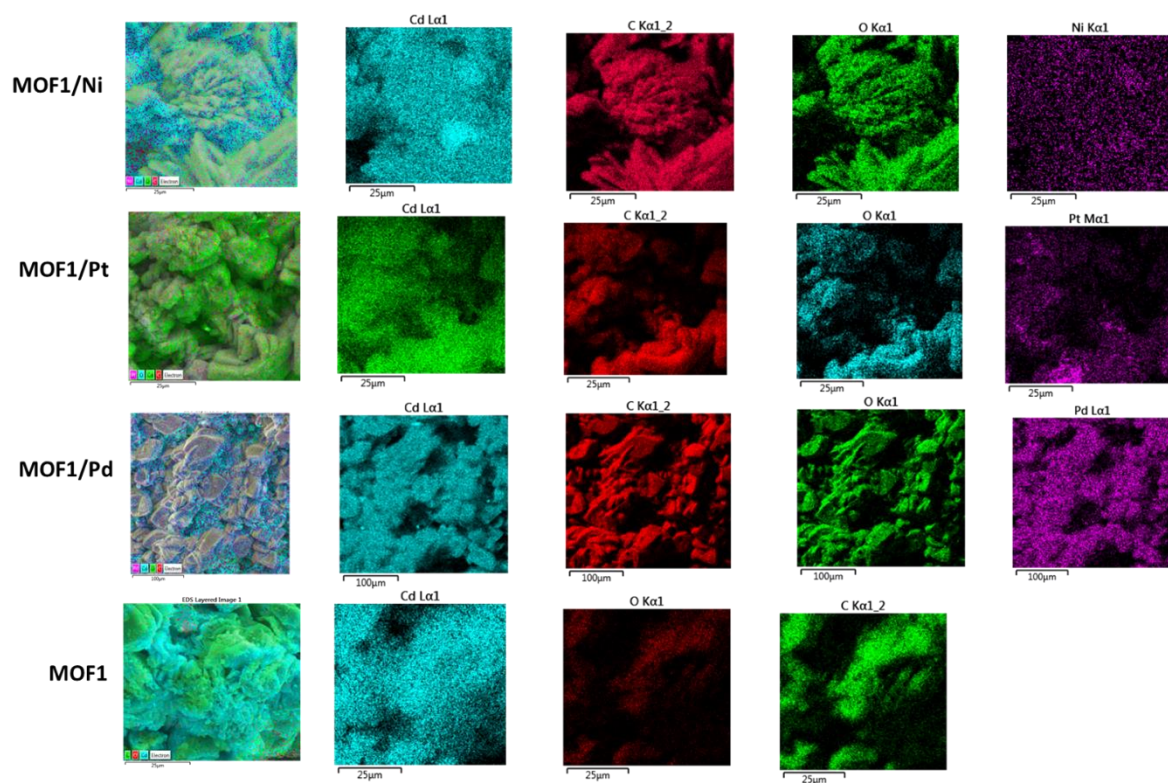

**Figure S3: Elemental mapping of MOF1/Ni, MOF1/Pd and MOF1/Pt.**

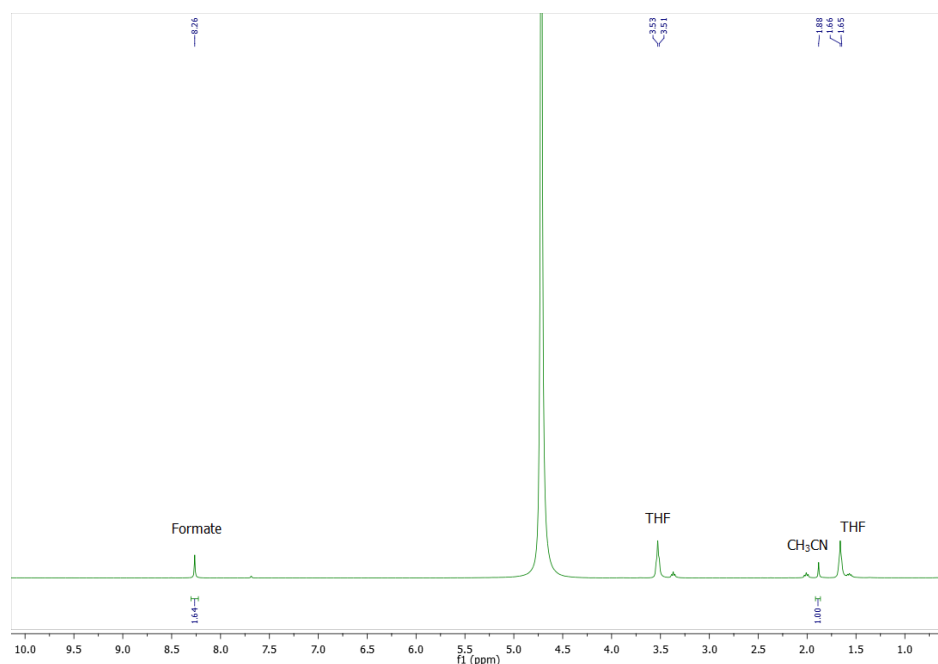

**Figure S4: Example of  $^1\text{H}$  NMR spectrum after hydrogenation of  $\text{CO}_2$  using THF and KOH base and pre-catalyst MOF1@Pd at 160 °C for 24 h recorded in  $\text{D}_2\text{O}$  at 25 °C in the presence of  $\text{CH}_3\text{CN}$  internal standard.**

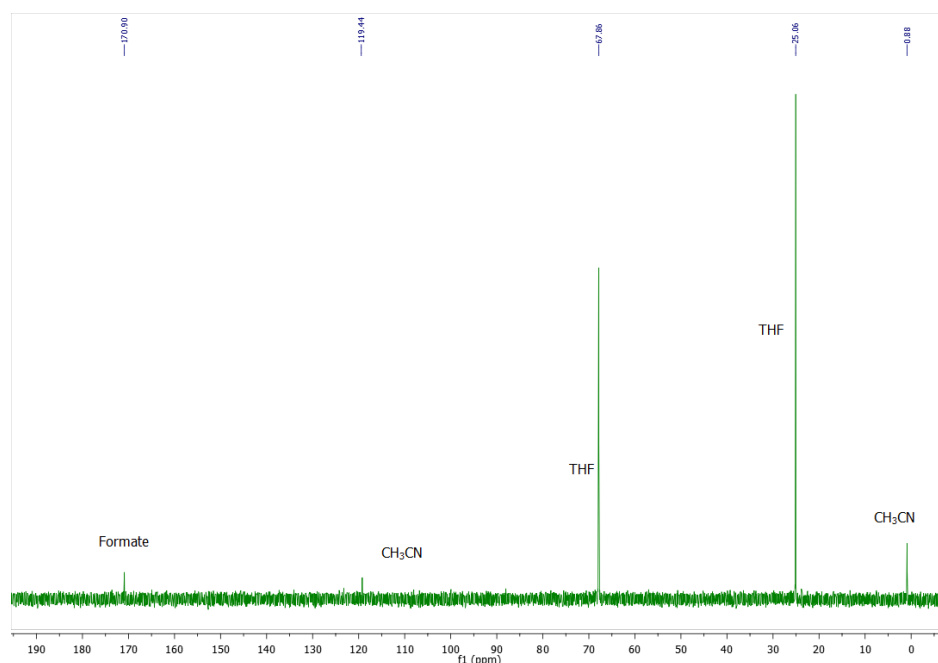

**Figure S5: Example of  $^1\text{H}\{^{13}\text{C}\}$  NMR spectrum after hydrogenation of  $\text{CO}_2$  using THF and KOH with pre-catalyst MOF1@Pd at 160 °C for 24 h recorded in  $\text{D}_2\text{O}$  at 25 °C.**
